# Supplementary material for: Streptococcus dysgalactiae subsp. dysgalactiae isolated from milk of the bovine udder as emerging pathogens: In vitro and in vivo infection of human cells and zebrafish as biological models
Source: PubMed Central journal article supplement (PMC6341033; doi:10.1002/mbo3.623), 2018-03-25
Supplement: MBO3-8-e00623-s002.pdf [file MBO3-8-e00623-s002.pdf]

|               |            |             |             |            |            |            |     |
|---------------|------------|-------------|-------------|------------|------------|------------|-----|
|               |            | 20          |             | 40         |            | 60         |     |
| VSD21+fbpA    | ACAGATAAAT | TAAAACGGTT  | CCGTGAGTTT  | TTTGCTAGAC | CTACTCAAGC | AAGTTTAACC | 60  |
| VSD5+fbpA     | ACAGATAAAT | TAAAACGGTT  | CCGTGAGTTT  | TTTGCTAGAC | CTACTCAAGC | AAGTTTAACC | 60  |
| VSD9+fbpA     | ACAGATAAAT | TAAAACGGTT  | CCGTGAGTTT  | TTTGCTAGAC | CTACTCAAGC | AAGTTTAACC | 60  |
| VSD23+fbpA    | ACAGATAAAT | TAAAACGGTT  | CCGTGAGTTT  | TTTGCTAGAC | CTACTCAAGC | AAGTTTAACC | 60  |
| VSD24+fbpA    | ACAGATAAAT | TAAAACGGTT  | CCGTGAGTTT  | TTTGCTAGAC | CTACTCAAGC | AAGTTTAACC | 60  |
| VSD13+fbpA    | ACAGATAAAT | TAAAACGGTT  | CCGTGAGTTT  | TTTGCTAGAC | CTACTCAAGC | AAGTTTAACC | 60  |
| COI289+fbpA   | ACAGACAAAT | TAAAACGGTT  | CCGTGAGTTT  | TTTGCTAGAC | CTACTCAAGC | AAGTTTAACC | 60  |
| SDSE GGS124   | ACAGACAAAT | TAAAACGGTT  | CCGTGAGTTT  | TTTGCTAGAC | CTACTCAAGC | AAGTTTAACC | 60  |
| HSM53+fbpA    | ACAGACAAAT | TAAAACGGTT  | CCGTGAGTTT  | TTTGCTAGAC | CTACTCAAGC | AAGTTTAACC | 60  |
| Consensus     | ACAGATAAAT | TAAAACGGTT  | CCGTGAGTTT  | TTTGCTAGAC | CTACTCAAGC | AAGTTTAACC |     |
| Sequence logo |            |             |             |            |            |            |     |
|               |            | 80          |             | 100        |            | 120        |     |
| VSD21+fbpA    | AATACCTCTT | TTGCACCAGT  | TCTTTTCTCA  | GAGAGCCAAG | CAACGTTTGA | GACTTTATCA | 120 |
| VSD5+fbpA     | AATACCTCTT | TTGCACCAGT  | TCTTTTCTCA  | GAGAGCCAAG | CAACGTTTGA | GACTTTATCA | 120 |
| VSD9+fbpA     | AATACCTCTT | TTGCACCAGT  | TCTTTTCTCA  | GAGAGCCAAG | CAACGTTTGA | GACTTTATCA | 120 |
| VSD23+fbpA    | AATACCTCTT | TTGCACCAGT  | TCTTTTCTCA  | GAGAGCCAAG | CAACGTTTGA | GACTTTATCA | 120 |
| VSD24+fbpA    | AATACCTCTT | TTGCACCAGT  | TCTTTTCTCA  | GAGAGCCAAG | CAACGTTTGA | GACTTTATCA | 120 |
| VSD13+fbpA    | AATACCTCTT | TTGCACCAGT  | TCTTTTCTCA  | GAGAGCCAAG | CAACGTTTGA | GACTTTATCA | 120 |
| COI289+fbpA   | AATACCTCTT | TTGCACCAGT  | TCTTTTCTCA  | GAGAGCCAAG | TGACGTTTGA | GACTTTATCT | 120 |
| SDSE GGS124   | AATACCTCTT | TTGCACCAGT  | TCTTTTCTCA  | GAGAGCCAAG | TGACGTTTGA | GACTTTATCT | 120 |
| HSM53+fbpA    | AATACCTCTT | TTGCACCAGT  | TCTTTTCTCA  | GAGAGTCAAG | TGACGTTTGA | GACTTTATCT | 120 |
| Consensus     | AATACCTCTT | TTGCACCAGT  | TCTTTTCTCA  | GAGAGCCAAG | CAACGTTTGA | GACTTTATCA |     |
| Sequence logo |            |             |             |            |            |            |     |
|               |            | 140         |             | 160        |            | 180        |     |
| VSD21+fbpA    | GAGATGCTTG | ATCACCTTTA  | TCAAGATAAA  | GCTGAGCGTG | ACCGTATCAA | TCAACAAGCG | 180 |
| VSD5+fbpA     | GAGATGCTTG | ATCACCTTTA  | TCAAGATAAA  | GCTGAGCGTG | ACCGTATCAA | TCAACAAGCG | 180 |
| VSD9+fbpA     | GAGATGCTTG | ATCACCTTTA  | TCAAGATAAA  | GCTGAGCGTG | ACCGTATCAA | TCAACAAGCG | 180 |
| VSD23+fbpA    | GAGATGCTTG | ATCACCTTTA  | TCAAGATAAA  | GCTGAGCGTG | ACCGTATCAA | TCAACAAGCG | 180 |
| VSD24+fbpA    | GAGATGCTTG | ATCACCTTTA  | TCAAGATAAA  | GCTGAGCGTG | ACCGTATCAA | TCAACAAGCG | 180 |
| VSD13+fbpA    | GAGATGCTTG | ATCACCTTTA  | TCAAGATAAA  | GCTGAGCGTG | ACCGTATCAA | TCAACAAGCG | 180 |
| COI289+fbpA   | GAGATGCTTG | ATCACCTTTA  | TCAAGATAAA  | GCTGAGCGTG | ACCGTATCAA | TCAACAAGCG | 180 |
| SDSE GGS124   | GAGATGCTTG | ATCACCTTTA  | TCAAGATAAG  | GCTGAGCGTG | ACCGTATCAA | TCAACAAGCG | 180 |
| HSM53+fbpA    | GAGATGCTTG | ATCACCTTTA  | TCAAGATAAG  | GCTGAGCGTG | ACCGTATCAA | TCAACAAGCG | 180 |
| Consensus     | GAGATGCTTG | ATCACCTTTA  | TCAAGATAAA  | GCTGAGCGTG | ACCGTATCAA | TCAACAAGCG |     |
| Sequence logo |            |             |             |            |            |            |     |
|               |            | 200         |             | 220        |            | 240        |     |
| VSD21+fbpA    | AGTGACTTGA | TTCACCGTGT  | ACAAAAATGAA | CTAGAAAAAA | ATCGCAACAA | ACTAAGAAAA | 240 |
| VSD5+fbpA     | AGTGACTTGA | TTCACCGTGT  | ACAAAAATGAA | CTAGAAAAAA | ATCGCAACAA | ACTAAGAAAA | 240 |
| VSD9+fbpA     | AGTGACTTGA | TTCACCGTGT  | ACAAAAATGAA | CTAGAAAAAA | ATCGCAACAA | ACTAAGAAAA | 240 |
| VSD23+fbpA    | AGTGACTTGA | TTCACCGTGT  | ACAAAAATGAA | CTAGAAAAAA | ATCGCAACAA | ACTAAGAAAA | 240 |
| VSD24+fbpA    | AGTGACTTGA | TTCACCGTGT  | ACAAAAATGAA | CTAGAAAAAA | ATCGCAACAA | ACTAAGAAAA | 240 |
| VSD13+fbpA    | AGTGACTTGA | TTCACCGTGT  | ACAAAAATGAA | CTAGAAAAAA | ATCGCAACAA | ACTAAGAAAA | 240 |
| COI289+fbpA   | AGTGACTTGA | TTCACCGTGT  | GCAAAAATGAA | CTAGAAAAAA | ATCGCAACAA | ACTAAGTAAA | 240 |
| SDSE GGS124   | AGTGACTTGA | TTCACCGTGT  | GCAAAAATGAA | CTAGAAAAAA | ATCGCAACAA | ACTAAGTAAA | 240 |
| HSM53+fbpA    | AGTGACTTGA | TTCACCGTGT  | GCAAAAATGAA | CTAGAAAAAA | ATCGCAACAA | ACTAAGTAAA | 240 |
| Consensus     | AGTGACTTGA | TTCACCGTGT  | ACAAAAATGAA | CTAGAAAAAA | ATCGCAACAA | ACTAAGAAAA |     |
| Sequence logo |            |             |             |            |            |            |     |
|               |            | 260         |             | 280        |            | 300        |     |
| VSD21+fbpA    | CAAGAAGCTG | AACCTTTTGGC | TACGGAAAAAC | GCTGAGTTGT | TCCGCCAAAA | AGGTGAGCTG | 300 |
| VSD5+fbpA     | CAAGAAGCTG | AACCTTTTGGC | TACGGAAAAAC | GCTGAGTTGT | TCCGCCAAAA | AGGTGAGCTG | 300 |
| VSD9+fbpA     | CAAGAAGCTG | AACCTTTTGGC | TACGGAAAAAC | GCTGAGTTGT | TCCGCCAAAA | AGGTGAGCTG | 300 |
| VSD23+fbpA    | CAAGAAGCTG | AACCTTTTGGC | TACGGAAAAAC | GCTGAGTTGT | TCCGCCAAAA | AGGTGAGCTG | 300 |
| VSD24+fbpA    | CAAGAAGCTG | AACCTTTTGGC | TACGGAAAAAC | GCTGAGTTGT | TCCGCCAAAA | AGGTGAGCTG | 300 |
| VSD13+fbpA    | CAAGAAGCTG | AACCTTTTGGC | TACGGAAAAAC | GCTGAGTTGT | TCCGCCAAAA | AGGTGAGCTG | 300 |
| COI289+fbpA   | CAAGAAGCTG | AACCTTTTGGC | TACGGAAAAAC | GCTGAGTTGT | TCCGTCAAAA | AGGAGAGCTG | 300 |
| SDSE GGS124   | CAAGAAGCTG | AACCTTTTGGC | TACGGAAAAAC | GCTGAGTTGT | TCCGTCAAAA | AGGAGAGCTG | 300 |
| HSM53+fbpA    | CAAGAAGCTG | AACCTTTTGGC | TACGGAAAAAC | GCTGAGTTGT | TCCGTCAAAA | AGGAGAGCTG | 300 |
| Consensus     | CAAGAAGCTG | AACCTTTTGGC | TACGGAAAAAC | GCTGAGTTGT | TCCGCCAAAA | AGGTGAGCTG |     |
| Sequence logo |            |             |             |            |            |            |     |
|               |            | 320         |             | 340        |            | 360        |     |
| VSD21+fbpA    | TAAACCACTT | ACCTCAGTAT  | GGTTCCTAAT  | AACCAGGACT | CCGTGGTGT  | AGACAATTAT | 360 |
| VSD5+fbpA     | TAAACCACTT | ACCTCAGTAT  | GGTTCCTAAT  | AACCAGGACT | CCGTGGTGT  | AGACAATTAT | 360 |
| VSD9+fbpA     | TAAACCACTT | ACCTCAGTAT  | GGTTCCTAAT  | AACCAGGACT | CCGTGGTGT  | AGACAATTAT | 360 |
| VSD23+fbpA    | TAAACCACTT | ACCTCAGTAT  | GGTTCCTAAT  | AACCAGGACT | CCGTGGTGT  | AGACAATTAT | 360 |
| VSD24+fbpA    | TAAACCACTT | ACCTCAGTAT  | GGTTCCTAAT  | AACCAGGACT | CCGTGGTGT  | AGACAATTAT | 360 |
| VSD13+fbpA    | TAAACCACTT | ACCTCAGTAT  | GGTTCCTAAT  | AACCAGGACT | CCGTGGTGT  | AGACAATTAT | 360 |
| COI289+fbpA   | TAAACCACTT | ACATCAGTAT  | GGTTCCTAAT  | AACCAAGACT | CCGTGGTATT | AGACAATTAT | 360 |
| SDSE GGS124   | TAAACCACTT | ACATCAGTAT  | GGTTCCTAAT  | AACCAAGACT | CCGTGGTATT | AGACAATTAT | 360 |
| HSM53+fbpA    | TAAACCACTT | ACATCAGTAT  | GGTTCCTAAT  | AACCAAGACT | CCGTGGTATT | AGACAATTAT | 360 |
| Consensus     | TAAACCACTT | ACCTCAGTAT  | GGTTCCTAAT  | AACCAGGACT | CCGTGGTGT  | AGACAATTAT |     |
| Sequence logo |            |             |             |            |            |            |     |

|               |            |            |            |            |            |            |     |
|---------------|------------|------------|------------|------------|------------|------------|-----|
|               |            | 380        |            | 400        |            | 420        |     |
| VSD21+fbpA    | TACACAGGCG | AAAAGATTGA | GATTGCCTTA | GACAAGGCAC | TAAACCCCAA | TCAAAATGCT | 420 |
| VSD5+fbpA     | TACACAGGCG | AAAAGATTGA | GATTGCCTTA | GACAAGGCAC | TAAACCCCAA | TCAAAATGCT | 420 |
| VSD9+fbpA     | TACACAGGCG | AAAAGATTGA | GATTGCCTTA | GACAAGGCAC | TAAACCCCAA | TCAAAATGCT | 420 |
| VSD23+fbpA    | TACACAGGCG | AAAAGATTGA | GATTGCCTTA | GACAAGGCAC | TAAACCCCAA | TCAAAATGCT | 420 |
| VSD24+fbpA    | TACACAGGCG | AAAAGATTGA | GATTGCCTTA | GACAAGGCAC | TAAACCCCAA | TCAAAATGCT | 420 |
| VSD13+fbpA    | TACACAGGCG | AAAAGATTGA | GATTGCCTTA | GACAAGGCAC | TAAACCCCAA | TCAAAATGCT | 420 |
| COI289+fbpA   | TACACGGGCG | AAAAGCTTGA | GATTGCCCTA | GACAAGGCAC | TAAACCTTAA | TCAAAATGCT | 420 |
| SDSE GGS124   | TACACGGGCG | AAAAGCTTGA | GATTGCCCTA | GACAAGGCAC | TAAACCTTAA | TCAAAATGCT | 420 |
| HSM53+fbpA    | TACACGGGCG | AAAAGCTTGA | AATTGCCCTA | GACAAGGCAC | TAAAGCTTAA | TCAAAATGCT | 420 |
| Consensus     | TACACAGGCG | AAAAGATTGA | GATTGCCTTA | GACAAGGCAC | TAAACCCCAA | TCAAAATGCT |     |
| Sequence logo |            |            |            |            |            |            |     |
|               |            | 440        |            | 460        |            | 480        |     |
| VSD21+fbpA    | CAACGTTATT | TTAAAAAATA | CCAAAAGCTA | AAAGAAGCTG | TCAAACACTT | ATCTGGATTG | 480 |
| VSD5+fbpA     | CAACGTTATT | TTAAAAAATA | CCAAAAGCTA | AAAGAAGCTG | TCAAACACTT | ATCTGGATTG | 480 |
| VSD9+fbpA     | CAACGTTATT | TTAAAAAATA | CCAAAAGCTA | AAAGAAGCTG | TCAAACACTT | ATCTGGATTG | 480 |
| VSD23+fbpA    | CAACGTTATT | TTAAAAAATA | CCAAAAGCTA | AAAGAAGCTG | TCAAACACTT | ATCTGGATTG | 480 |
| VSD24+fbpA    | CAACGTTATT | TTAAAAAATA | CCAAAAGCTA | AAAGAAGCTG | TCAAACACTT | ATCTGGATTG | 480 |
| VSD13+fbpA    | CAACGTTATT | TTAAAAAATA | CCAAAAGCTA | AAAGAAGCTG | TCAAACACTT | ATCTGGATTG | 480 |
| COI289+fbpA   | CAACGTTATT | TTAAAAAATA | CCAAAAGCTA | AAAGAAGCTG | TCAAACACTT | ATCTGGATTG | 480 |
| SDSE GGS124   | CAACGTTATT | TTAAAAAATA | CCAAAAGCTA | AAAGAAGCTG | TCAAACACTT | ATCTGGATTG | 480 |
| HSM53+fbpA    | CAACGTTATT | TTAAAAAATA | CCAAAAGCTA | AAAGAAGCTG | TCAAACACTT | ATCTGGATTG | 480 |
| Consensus     | CAACGTTATT | TTAAAAAATA | CCAAAAGCTA | AAAGAAGCTG | TCAAACACTT | ATCTGGATTG |     |
| Sequence logo |            |            |            |            |            |            |     |
|               |            | 500        |            | 520        |            | 540        |     |
| VSD21+fbpA    | ATTACCGATA | CCAAGCAAAG | TATTGCGTAT | TTTGAGAGTG | TGGACTACAA | TTTGTCCCAA | 540 |
| VSD5+fbpA     | ATTACCGATA | CCAAGCAAAG | TATTGCGTAT | TTTGAGAGTG | TGGACTACAA | TTTGTCCCAA | 540 |
| VSD9+fbpA     | ATTACCGATA | CCAAGCAAAG | TATTGCGTAT | TTTGAGAGTG | TGGACTACAA | TTTGTCCCAA | 540 |
| VSD23+fbpA    | ATTACCGATA | CCAAGCAAAG | TATTGCGTAT | TTTGAGAGTG | TGGACTACAA | TTTGTCCCAA | 540 |
| VSD24+fbpA    | ATTACCGATA | CCAAGCAAAG | TATTGCGTAT | TTTGAGAGTG | TGGACTACAA | TTTGTCCCAA | 540 |
| VSD13+fbpA    | ATTACCGATA | CCAAGCAAAG | TATTGCGTAT | TTTGAGAGTG | TGGACTACAA | TTTGTCCCAA | 540 |
| COI289+fbpA   | ATTGCCGATA | CCAAGCAAAG | TATTGCTTAC | TTTGAGAGCG | TGGACTACAA | TTTATCCCAA | 540 |
| SDSE GGS124   | ATTGCCGATA | CCAAGCAAAG | TATTGCTTAC | TTTGAGAGCG | TGGACTACAA | TTTATCCCAA | 540 |
| HSM53+fbpA    | ATTGCCGATA | CCAAGCAAAG | TATTGCTTAC | TTTGAGAGCG | TGGACTACAA | TTTATCCCAA | 540 |
| Consensus     | ATTACCGATA | CCAAGCAAAG | TATTGCGTAT | TTTGAGAGTG | TGGACTACAA | TTTGTCCCAA |     |
| Sequence logo |            |            |            |            |            |            |     |
|               |            | 560        |            | 580        |            | 600        |     |
| VSD21+fbpA    | GTAAGTATCG | AAGATATTGA | AGATATTCCG | GAAGAGTTAT | ATCAAGCTGG | CTTTTTGAAA | 600 |
| VSD5+fbpA     | GTAAGTATCG | AAGATATTGA | AGATATTCCG | GAAGAGTTAT | ATCAAGCTGG | CTTTTTGAAA | 600 |
| VSD9+fbpA     | GTAAGTATCG | AAGATATTGA | AGATATTCCG | GAAGAGTTAT | ATCAAGCTGG | CTTTTTGAAA | 600 |
| VSD23+fbpA    | GTAAGTATCG | AAGATATTGA | AGATATTCCG | GAAGAGTTAT | ATCAAGCTGG | CTTTTTGAAA | 600 |
| VSD24+fbpA    | GTAAGTATCG | AAGATATTGA | AGATATTCCG | GAAGAGTTAT | ATCAAGCTGG | CTTTTTGAAA | 600 |
| VSD13+fbpA    | GTAAGTATCG | AAGATATTGA | AGATATTCCG | GAAGAGTTAT | ATCAAGCTGG | CTTTTTGAAA | 600 |
| COI289+fbpA   | GCAAGTATCG | AAGATATTGA | AGATATTCCG | GAAGAGTTAT | ATCAGGCTGG | CTTTTTGAAG | 600 |
| SDSE GGS124   | GCAAGTATCG | AAGATATTGA | AGATATTCCG | GAAGAGTTAT | ATCAGGCTGG | CTTTTTGAAG | 600 |
| HSM53+fbpA    | GCAAGTATCG | AAGATATTGA | AGATATTCCG | GAAGAGTTAT | ATCAGGCTGG | CTTTTTGAAG | 600 |
| Consensus     | GTAAGTATCG | AAGATATTGA | AGATATTCCG | GAAGAGTTAT | ATCAAGCTGG | CTTTTTGAAA |     |
| Sequence logo |            |            |            |            |            |            |     |
|               |            | 620        |            |            |            |            |     |
| VSD21+fbpA    | AGTCGCCACC | GTGATAAACG | 620        |            |            |            |     |
| VSD5+fbpA     | AGTCGCCACC | GTGATAAACG | 620        |            |            |            |     |
| VSD9+fbpA     | AGTCGCCACC | GTGATAAACG | 620        |            |            |            |     |
| VSD23+fbpA    | AGTCGCCACC | GTGATAAACG | 620        |            |            |            |     |
| VSD24+fbpA    | AGTCGCCACC | GTGATAAACG | 620        |            |            |            |     |
| VSD13+fbpA    | AGTCGCCACC | GTGATAAACG | 620        |            |            |            |     |
| COI289+fbpA   | AGTCGCCACC | GTGATAAACG | 620        |            |            |            |     |
| SDSE GGS124   | AGTCGCCACC | GTGATAAACG | 620        |            |            |            |     |
| HSM53+fbpA    | AGTCGCCACC | GTGATAAACG | 620        |            |            |            |     |
| Consensus     | AGTCGCCACC | GTGATAAACG |            |            |            |            |     |
| Sequence logo |            |            |            |            |            |            |     |
